# Supplementary material for: Cold Ischemia Time and Graft Fibrosis Are Associated with Autoantibodies after Pediatric Liver Transplantation: A Retrospective Cohort Study of the European Reference Network TransplantChild
Source: MDPI journal article supplement (doi:10.3390/children9020275), 2022-02-17
Supplement: s1 [file s1]

**Supplement Table S1.** Center specific differences.

|                                                                            | <b>Hannover<br/>n=88</b>          | <b>Bergamo<br/>n=61</b>          | <b>Paris<br/>n=75</b>             | <b>Warsaw<br/>n=14</b>            | <b>Vilnius<br/>n=11</b>      | <b>Rome<br/>n=4</b>               | <b>p=</b> |
|----------------------------------------------------------------------------|-----------------------------------|----------------------------------|-----------------------------------|-----------------------------------|------------------------------|-----------------------------------|-----------|
| LD pLTX in %                                                               | 21.6%                             | 0.0%                             | 8.0%                              | 85.7%                             | 81.82%                       | 0.0%                              | 0.000     |
| Split in %                                                                 | 77.3%                             | 80.3%                            | 84.0%                             | 85.7%                             | 100.0%                       | 50.0%                             | 0.260     |
| >1 IS drug %                                                               | 11.4%                             | 26.2%                            | 50.7%                             | 71.4%                             | 27.3%                        | 75.0%                             | 0.000     |
| ISHAK Fibrosis Score<br>(F0-6)                                             | 1.00/1.95/<br>1.11-2.80<br>(n=21) | 2.00/1.89/<br>0.59-3.19<br>(n=9) | 1.00/1.81/<br>1.27-2.36<br>(n=32) | 1.00/0.79/<br>-0.05-1.16<br>(n=7) | n.a.                         | 1.75/1.75/<br>-1.43-4.93<br>(n=2) | 0.500     |
| CIT<br>median/mean/95%CI                                                   | 567/536/<br>491-580 min           | 355/ 337/<br>316-358 min         | n.a.                              | 255/295/<br>231-358 min           | n.a.                         | n.a.                              | 0.000     |
| Age at pLTX;<br>median/mean/95%CI                                          | 2.00/3.02/<br>2.27-3.78           | 1.00/2.72/<br>1.71-3.74          | 2.00/3.60/<br>2.60-4.60           | 1.00/2.79/<br>0.16-5.41           | 2.00/3.27/<br>0.49-6.06      | 9.00/8.00/<br>-1.64-17.64         | 0.359     |
| Age at AAB analysis;<br>median/mean/95%CI                                  | 9.00/9.00/<br>7.98-10.02          | 5.00/6.26/<br>5.06-7.46          | 9.00/9.14/<br>6.24-12.04          | 6.00/7.26/<br>6.08-8.43           | 10.00/9.55/<br>5.85-13.24    | 13.5/12.75/<br>8.57-16.93         | 0.001     |
| Interval between pLTX and<br>AAB analysis in months;<br>median /mean/95%CI | 66.00/71.52/<br>61.13-81.91       | 32.00/39.98/<br>31.89-48.08      | 35.00/42.88/<br>35.37-50.39       | 59.50/74.43/<br>40.10-108.75      | 52.00/74.91/<br>34.15-115.67 | 57.50/57.00/<br>-4.23-118.23      | 0.000     |
| ANA positive (>1:40)                                                       | 43 (48.86%)                       | 11 (18.03%)                      | 5 (6.76%)                         | 5 (38.46%)                        | 0 (0%)                       | 2 (50%)                           |           |
| ANA > 1:80                                                                 | 24 (27.27%)                       | 11 (18.03%)                      | 4 (5.41%)                         | 1 (7.69%)                         | 0 (0%)                       | 2 (50%)                           |           |
| SMA positive (>1:20)                                                       | 82 (93.2%)                        | 26 (42.63%)                      | 10 (13.51%)                       | 10 (71.43%)                       | 0 (0%)                       | 3 (75%)                           |           |
| SMA > 1:80                                                                 | 5 (5.68)                          | 0 (0%)                           | 1 (1.35%)                         | 3 (21.43%)                        | 0 (0%)                       | 0 (0%)                            |           |

pLTX= pediatric liver transplantation, LD=living donor donation, IS=immunosuppressive, CR= chronic rejection, CIT= cold ischemia time, , AAB= auto-antibody, CI= confidence interval, n.a.=no data available.

**Supplement Table S2. ISHAK Fibrosis Score**

| <b>Histological result</b>                                                                             | <b>ISHAK Fibrosis Score</b> |
|--------------------------------------------------------------------------------------------------------|-----------------------------|
| No fibrosis                                                                                            | <b>0</b>                    |
| Fibrous expansion of some portal areas, with or without short fibrous septa                            | <b>1</b>                    |
| Fibrous expansion of most portal areas, with or without short fibrous septa                            | <b>2</b>                    |
| Fibrous expansion of most portal areas with occasional portal to portal bridging                       | <b>3</b>                    |
| Fibrous expansion of portal areas with marked bridging (portal to portal as well as portal to central) | <b>4</b>                    |
| Marked bridging (portal–portal and/or portal–central) with occasional nodules (incomplete cirrhosis)   | <b>5</b>                    |
| Cirrhosis, probable or definite                                                                        | <b>6</b>                    |

**Supplement Table S3. Rejection Activity Index**

| <b>Category</b>                        | <b>Criteria</b>                                                                                                                                                                                                       | <b>Score</b> |
|----------------------------------------|-----------------------------------------------------------------------------------------------------------------------------------------------------------------------------------------------------------------------|--------------|
| <b>Portal Inflammation</b>             | Mostly lymphocytic inflammation involving, but not noticeably expanding, a minority of the triads                                                                                                                     | <b>1</b>     |
|                                        | Expansion of most or all of the triads, by a mixed infiltrate containing lymphocytes with occasional blasts, neutrophils and eosinophils                                                                              | <b>2</b>     |
|                                        | Marked expansion of most or all of the triads by a mixed infiltrate containing numerous blasts and eosinophils with inflammatory spillover into the periportal parenchyma                                             | <b>3</b>     |
| <b>Bile Duct Inflammation Damage</b>   | A minority of the ducts are cuffed and infiltrated by inflammatory cells and show only mild reactive changes such as increased nuclear:cytoplasmic ratio of the epithelial cells                                      | <b>1</b>     |
|                                        | Most or all of the ducts infiltrated by inflammatory cells. More than an occasional duct shows degenerative changes such as nuclear pleomorphism, disordered polarity and cytoplasmic vacuolization of the epithelium | <b>2</b>     |
|                                        | As above for 2, with most or all of the ducts showing degenerative changes or focal luminal disruption                                                                                                                | <b>3</b>     |
| <b>Venous Endothelial Inflammation</b> | Subendothelial lymphocytic infiltration involving some, but not a majority of the portal and/or hepatic venules                                                                                                       | <b>1</b>     |
|                                        | Subendothelial infiltration involving most or all of the portal and/or hepatic venules                                                                                                                                | <b>2</b>     |
|                                        | As above for 2, with moderate or severe perivenular inflammation that extends into the perivenular parenchyma and is associated with perivenular hepatocyte necrosis                                                  | <b>3</b>     |

**The RAI Score is the sum of the 3 category scores (maximum score 9).**

Adapted from: Banff schema for grading liver allograft rejection: an international consensus document. Hepatology. 1997 Mar;25(3):658-63. doi: 10.1002/hep.510250328. PMID: 9049215.
